# Supplementary material for: Developing low-loss and temperature-stable Ban(Zr,Nb)n−1O3n (n = 7, 8) microwave dielectric ceramics by investigating the relationship between the structure and properties
Source: Royal Society of Chemistry journal article supplement (doi:10.1039/d2qi01107g), 2022-01-01
Supplement: d2qi01107g1.pdf [file d2qi01107g1.pdf]

**Developing Low-Loss and Temperature-Stable  $\text{Ba}_n(\text{Zr,Nb})_{n-1}\text{O}_{3n}$  ( $n=7$ ,  
8) Microwave Dielectric Ceramics by Investigating Relationship  
between Structure and Properties**

Pengcheng Zhang<sup>1</sup>, Hao Li<sup>1\*</sup>, Xiaoqing Chen<sup>1</sup>, Shucheng Liu<sup>1</sup>, Quanzhang Wen<sup>1</sup>, Canbing Li<sup>1</sup>,  
hanning Xiao<sup>2</sup>

College of Electrical and Information Engineering, Hunan University, Changsha 410082, China

College of Materials Science and Engineering, Hunan University, Changsha 410082, China

\*Corresponding author: E-mail: hli@hnu.edu.cn (Hao Li)

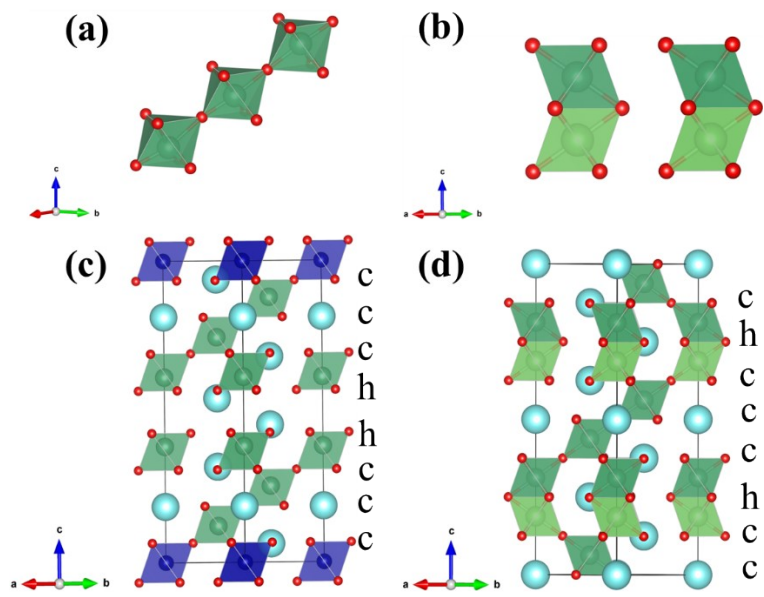

Fig.S1 (a) Corner sharing connection;(b) Face-sharing connection; Shifted (c) and twinned (d) hexagonal perovskite structures.

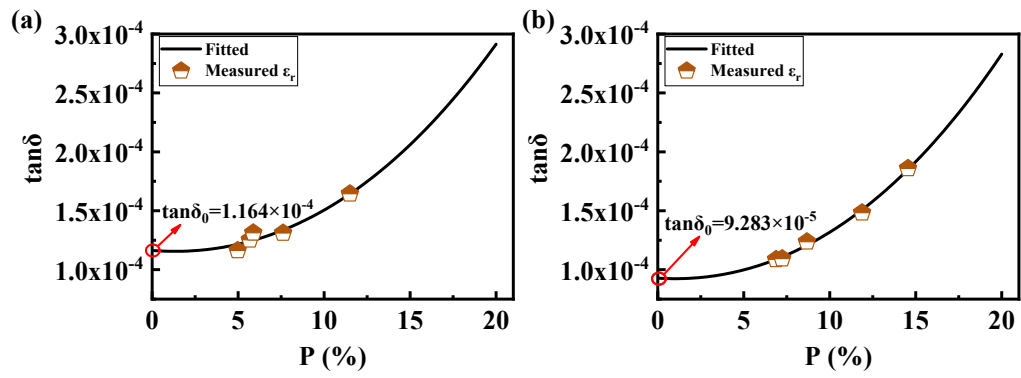

Fig.S2 The effect of porosity on  $\tan\delta$  of  $\text{Ba}_7\text{Zr}_2\text{Nb}_4\text{O}_{21}$  (a) and  $\text{Ba}_8\text{Zr}_3\text{Nb}_4\text{O}_{24}$  (b).

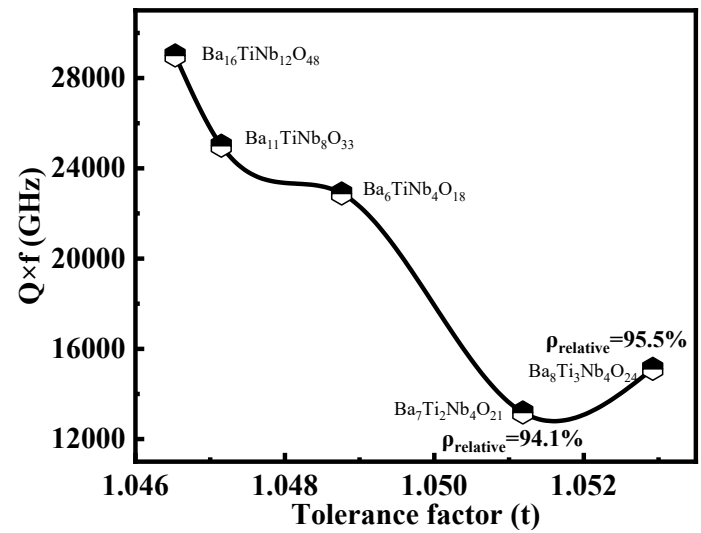

Fig.S3 The  $Q \times f$  as a function of tolerance factor in BaO-TiO<sub>2</sub>-Nb<sub>2</sub>O<sub>5</sub> systems.
